# Supplementary material for: Dihydromyricetin Enhances Exercise-Induced GLP-1 Elevation through Stimulating cAMP and Inhibiting DPP-4
Source: Nutrients. 2022 Nov 1;14(21):4583. doi: 10.3390/nu14214583 (PMC9656859; doi:10.3390/nu14214583)
Supplement: Supplementary file 1 [file nutrients-14-04583-s001.zip]

Archive with 4 entries (4 files):
- figure S1.tif
- Figure S2.tif
- Figure S3.pdf
- supplement material.pdf
